# Supplementary material
Source: HighWire-hosted journal article supplement (http://thorax.bmjjournals.com/highwire/filestream/174159/field_highwire_adjunct_files/1/644345webonlyapp2.pdf)
Supplement: 644345webonlyapp2.pdf [file 644345webonlyapp2.pdf]

Supplementary Table 1

| NO. | Polymorphism | Position     | Gene    | Coordinate<br>ensembl R3.4e | % genotyping<br>failure | HWE<br>CHI | HWE<br>p | Freq<br>SE(freq) | Major<br>allele | Minor<br>allele | Ancestral<br>allele | Disease<br>association | CNS<br>region | Altered<br>TF binding               |
|-----|--------------|--------------|---------|-----------------------------|-------------------------|------------|----------|------------------|-----------------|-----------------|---------------------|------------------------|---------------|-------------------------------------|
| 1   | rs17674015   |              |         | 131437995                   | 1.6                     | 0.01       | 0.94     | 0.29             | 0.04            | G               | T                   |                        |               | NFAT-1 (WT)                         |
| 2   | rs12656759   |              |         | 131443827                   | 3.1                     | 0.01       | 0.93     | 0.50             | 0.04            | G               | A                   | G                      |               | runt-factor AML-1 (WT)              |
| 3   | rs587759     | Promoter     | IL3     | 131466896                   | 3.1                     | 0.01       | 0.91     | 0.20             | 0.04            | G               | A                   | G                      |               |                                     |
| 4   | rs151791     | Promoter     | IL3     | 131471331                   | 17.2                    | 1.98       | 0.16     | 0.05             | 0.02            | G               | A                   | G                      |               |                                     |
| 5   | rs31460      | Promoter     | IL3     | 131472548                   | 10.9                    | 0.05       | 0.82     | 0.26             | 0.04            | C               | T                   |                        |               | cellular and viral coxsack box (WT) |
| 6   | rs40401      | Exon         | IL3     | 131472694                   | 10.9                    | 0.05       | 0.82     | 0.26             | 0.04            | C               | T                   |                        |               |                                     |
| 7   | rs31481      | Intron       | IL3     | 131473418                   | 10.9                    | 0.01       | 0.91     | 0.21             | 0.04            | G               | A                   |                        |               | nfat-1 and AREB (WT)                |
| 8   | rs2069803    | 3'UTR        | IL3     | 131476649                   | 18.8                    | 0.82       | 0.37     | 0.32             | 0.04            | T               | C                   |                        |               |                                     |
| 9   | rs246844     | 3'UTR        | IL3     | 131477550                   | 0.0                     | 0.06       | 0.81     | 0.22             | 0.04            | G               | A                   |                        |               | ARE B6 (WT)                         |
| 10  | rs3091338    | 3'UTR        | IL3     | 131478954                   | 10.9                    | 0.06       | 0.81     | 0.35             | 0.04            | C               | T                   | C                      |               |                                     |
| 11  | rs31473      | 3'UTR        | IL3     | 131480652                   | 1.6                     | 0.10       | 0.75     | 0.28             | 0.04            | A               | T                   |                        |               |                                     |
| 12  | rs721121     | Enhancer     | CSF2    | 131482649                   | 3.1                     | 0.25       | 0.62     | 0.39             | 0.04            | T               | G                   | T                      |               |                                     |
| 13  | rs27348      | 3'UTR        | CSF2    | 131483355                   | 0.0                     | 0.50       | 0.48     | 0.27             | 0.04            | T               | A                   |                        |               |                                     |
| 14  | rs2069614    | Promoter     | CSF2    | 131483817                   | 4.7                     | 0.52       | 0.47     | 0.38             | 0.04            | T               | C                   |                        |               |                                     |
| 15  | rs2069616    | Promoter     | CSF2    | 131484293                   | 1.6                     | 0.59       | 0.44     | 0.37             | 0.04            | A               | G                   |                        |               | runt factor AML-1 (WT)              |
| 16  | rs1469149    | Promoter     | CSF2    | 131485058                   | 1.6                     | 0.27       | 0.61     | 0.34             | 0.04            | A               | C                   |                        |               | zinc finger (MT)                    |
| 17  | rs743594     | Intron       | CSF2    | 131487095                   | 14.1                    | 0.40       | 0.53     | 0.32             | 0.04            | T               | C                   | T                      |               |                                     |
| 18  | rs25981      | Intron       | CSF2    | 131497354                   | 1.6                     | 0.01       | 0.91     | 0.23             | 0.04            | G               | T                   |                        |               |                                     |
| 19  | rs25882      | exon         | CSF2    | 131485767                   | 4.7                     | 0.51       | 0.47     | 0.27             | 0.04            | T               | C                   |                        |               | Gata binding factor 1 (MT)          |
| 20  | rs25883      | 3'UTR        | CSF2    | 131488148                   | 14.1                    | 0.08       | 0.77     | 0.26             | 0.04            | G               | A                   |                        |               | areb6 (WT / MT)                     |
| 21  | rs25884      | 3'UTR        | CSF2    | 131488454                   | 10.9                    | 0.01       | 0.93     | 0.25             | 0.04            | A               | G                   |                        |               |                                     |
| 22  | rs27438      | 3'UTR        | CSF2    | 131489471                   | 0.0                     | 0.35       | 0.56     | 0.26             | 0.04            | G               | A                   |                        |               |                                     |
| 23  | rs2301579    |              |         | 131629556                   | 4.7                     | 0.93       | 0.33     | 0.41             | 0.04            | G               | T                   | G                      | IBD           |                                     |
| 24  | rs7727544    |              |         | 131666750                   | 7.8                     | 1.21       | 0.27     | 0.40             | 0.04            | A               | G                   | G                      |               |                                     |
| 25  | rs99896      | Exon         | RIL     | 131691598                   | 3.1                     | 0.06       | 0.80     | 0.10             | 0.03            | G               | C                   |                        |               |                                     |
| 26  | rs168381     | Exon         | RIL     | 131689210                   | 0.0                     | 0.13       | 0.72     | 0.10             | 0.03            | T               | G                   |                        |               |                                     |
| 27  | IGR3070a.1   |              |         | 131699052                   | 4.7                     | 0.14       | 0.71     | 0.07             | 0.02            | G               | A                   |                        |               |                                     |
| 28  | rs7705189    |              |         | 131699574                   | 20.3                    | 0.17       | 0.68     | 0.44             | 0.04            | T               | C                   | T                      | IBD           | activator protein 4 (WT)            |
| 29  | rs157572     |              |         | 131702328                   | 0.0                     | 0.75       | 0.39     | 0.38             | 0.04            | C               | G                   | G                      |               |                                     |
| 30  | rs3761661    |              |         | 131704651                   | 10.9                    | 0.45       | 0.50     | 0.05             | 0.02            | A               | T                   | A                      |               |                                     |
| 31  | IGR3081a.1   |              |         | 131707069                   | 4.7                     | 0.16       | 0.69     | 0.39             | 0.04            | T               | G                   | T                      | IBD           |                                     |
| 32  | IGR3086a.1   |              |         | 131714541                   | 15.6                    | 0.06       | 0.91     | 0.44             | 0.04            | A               | T                   | A                      |               |                                     |
| 33  | rs2073538    | Exon         | SLC22A5 | 131725738                   | 3.1                     | 0.14       | 0.71     | 0.23             | 0.02            | A               | T                   |                        |               |                                     |
| 34  | rs272842     | Intron       | SLC22A4 | 131732733                   | 4.7                     | 0.16       | 0.69     | 0.39             | 0.04            | G               | A                   | A                      |               | icf11/kcr-1/nrf1 (WT)               |
| 35  | rs270602     |              |         | 131732916                   | 6.3                     | 0.20       | 0.65     | 0.39             | 0.04            | G               | A                   | A                      |               |                                     |
| 36  | rs273915     | Intron       | SLC22A4 | 131736335                   | 1.6                     | 0.04       | 0.85     | 0.33             | 0.04            | C               | G                   | C                      |               |                                     |
| 37  | rs273914     |              |         | 131736648                   | 10.9                    | 0.40       | 0.53     | 0.39             | 0.04            | A               | T                   | T                      |               | AP1 binding site (WT)               |
| 38  | IGR3018a.2   |              |         | 131738724                   | 12.5                    | 0.45       | 0.50     | 0.05             | 0.02            | T               | G                   | T                      |               |                                     |
| 39  | rs272893     | Exon         | SLC22A4 | 131739278                   | 4.7                     | 0.09       | 0.77     | 0.36             | 0.04            | G               | A                   | T                      |               | activator protein 4 (MT)            |
| 40  | rs254615     | Intron       | SLC22A5 | 131740355                   | 3.1                     | 0.04       | 0.85     | 0.31             | 0.04            | C               | T                   |                        |               |                                     |
| 41  | rs272879     | Exon         | SLC22A4 | 131746762                   | 4.7                     | 0.01       | 0.93     | 0.37             | 0.04            | C               | G                   | C                      |               |                                     |
| 42  | rs272874     | Intron       | SLC22A4 | 131751262                   | 4.7                     | 0.16       | 0.69     | 0.39             | 0.04            | T               | C                   | C                      |               |                                     |
| 43  | IGR2292a.1   |              |         | 131762696                   | 3.1                     | 0.14       | 0.71     | 0.06             | 0.02            | A               | C                   | A                      |               |                                     |
| 44  | rs4705938    |              |         | 131770293                   | 9.4                     | 0.03       | 0.85     | 0.42             | 0.04            | A               | G                   | A                      | IBD           |                                     |
| 45  | rs2631362    |              |         | 131783509                   | 12.5                    | 0.04       | 0.84     | 0.29             | 0.04            | T               | C                   | T                      |               |                                     |
| 46  | rs562460     | Intron       | SLC22A5 | 131786311                   | 1.6                     | 0.01       | 0.93     | 0.32             | 0.04            | C               | T                   |                        |               |                                     |
| 47  | rs274567     | Intron       | SLC22A5 | 131790325                   | 1.6                     | 0.15       | 0.70     | 0.38             | 0.04            | C               | T                   |                        |               |                                     |
| 48  | rs1762208    |              |         | 131792267                   | 9.4                     | 0.03       | 0.85     | 0.42             | 0.04            | C               | T                   | C                      | IBD           | EKLF/ activator protein 4 (WT)      |
| 49  | IGR2225a.1   |              |         | 131798906                   | 1.6                     | 0.14       | 0.71     | 0.06             | 0.02            | C               | A                   | C                      |               |                                     |
| 50  | rs274559     | E/I boundary | SLC22A5 | 131796286                   | 1.6                     | 0.15       | 0.70     | 0.38             | 0.04            | T               | C                   | C                      |               |                                     |
| 51  | rs274555     | Intron       | SLC22A5 | 131799167                   | 6.3                     | 0.06       | 0.81     | 0.38             | 0.04            | G               | A                   |                        |               |                                     |
| 52  | rs274550     |              |         | 131804928                   | 1.6                     | 0.03       | 0.87     | 0.25             | 0.04            | A               | C                   |                        |               | nfat1 (MT)                          |
| 53  | rs274549     | Intron       | SLC22A5 | 131805334                   | 0.0                     | 0.01       | 0.92     | 0.26             | 0.04            | G               | T                   | C                      |               |                                     |
| 54  | rs274548     | Intron       | SLC22A5 | 131807023                   | 4.7                     | 0.38       | 0.59     | 0.10             | 0.03            | C               | T                   |                        |               |                                     |
| 55  | rs14701      | Exon         | SLC22A5 | 131807139                   | 10.9                    | 0.02       | 0.87     | 0.27             | 0.04            | C               | A                   |                        |               | c-abl src type TK(WT)               |
| 56  | rs12517950   |              |         | 131807543                   | 1.6                     | 0.04       | 0.85     | 0.35             | 0.04            | T               | C                   | T                      |               | areb6 (WT)                          |
| 57  | rs1768995    |              |         | 131808991                   | 9.4                     | 0.04       | 0.84     | 0.16             | 0.03            | C               | T                   | C                      |               |                                     |
| 58  | rs11739135   |              |         | 131809614                   | 10.9                    | 0.01       | 0.94     | 0.31             | 0.04            | C               | G                   | G                      | IBD           |                                     |
| 59  | rs1016988    |              |         | 131820790                   | 3.1                     | 0.01       | 0.91     | 0.20             | 0.04            | A               | G                   | A                      |               |                                     |
| 60  | rs4875253    |              |         | 131852722                   | 3.1                     | 0.01       | 0.92     | 0.35             | 0.04            | T               | C                   | T                      |               | gata binding factor 1 (MT)          |
| 61  | rs2521869    |              |         | 131860910                   | 0.0                     | 0.00       | 0.94     | 0.37             | 0.04            | C               | A                   |                        | IBD           |                                     |
| 62  | rs252044     |              |         | 131868052                   | 0.0                     | 0.03       | 0.86     | 0.35             | 0.04            | G               | A                   | G                      |               |                                     |
| 63  | rs4705950    |              |         | 131869502                   | 17.2                    | 3.64       | 0.06     | 0.40             | 0.04            | G               | A                   |                        | IBD           |                                     |
| 64  | rs252047     |              |         | 131872098                   | 0.0                     | 0.01       | 0.92     | 0.23             | 0.04            | C               | A                   | C                      |               |                                     |
| 65  | rs2706393    |              |         | 131872283                   | 3.1                     | 0.03       | 0.87     | 0.23             | 0.04            | C               | T                   | C                      |               |                                     |
| 66  | IGR2063b.1   |              |         | 131878677                   | 9.9                     | 0.09       | 0.77     | 0.39             | 0.04            | G               | C                   | G                      | IBD           | cf11/kcrr1/nrf1 (MT)                |
| 67  | rs252057     |              |         | 131878163                   | 10.9                    | 0.01       | 0.94     | 0.36             | 0.04            | G               | C                   | G                      | IBD           |                                     |
| 68  | rs248116     |              |         | 131890359                   | 0.0                     | 0.02       | 0.94     | 0.11             | 0.03            | C               | T                   |                        | IBD           | heat shock factor 1 (MT)            |
| 69  | rs7719499    |              |         | 131890307                   | 0.0                     | 1.45       | 0.23     | 0.30             | 0.04            | G               | C                   | C                      |               | smad3 (WT)                          |
| 70  | rs839        | Exon         | IRF     | 131895342                   | 0.0                     | 1.02       | 0.31     | 0.30             | 0.04            | C               | T                   | C                      | JIA           |                                     |
| 71  | rs2070729    |              |         | 131896137                   | 3.1                     | 0.04       | 0.84     | 0.48             | 0.04            | C               | A                   | A                      |               |                                     |
| 72  | rs2070727    |              |         | 131896491                   | 3.1                     | 1.64       | 0.20     | 0.30             | 0.04            | C               | A                   | C                      |               |                                     |
| 73  | rs10068129   | Intron       | IRF     | 131897463                   | 0.0                     | 1.02       | 0.31     | 0.30             | 0.04            | C               | T                   | C                      |               |                                     |
| 74  | rs2070726    |              |         | 131897954                   | 0.0                     | 1.80       | 0.18     | 0.31             | 0.04            | C               | A                   | C                      |               |                                     |
| 75  | rs2070725    |              |         | 131898094                   | 7.8                     | 1.17       | 0.28     | 0.29             | 0.04            | G               | T                   | C                      |               |                                     |
| 76  | rs2706384    | Promoter     | IRF     | 131903096                   | 1.6                     | 1.31       | 0.25     | 0.30             | 0.04            | A               | C                   |                        |               | mz1 (MT)                            |
| 77  | rs2549005    |              |         | 131903407                   | 3.1                     | 1.64       | 0.20     | 0.30             | 0.04            | G               | A                   | C                      |               |                                     |
| 78  | IGR2008a.1   |              |         | 131903994                   | 4.7                     | 0.18       | 0.67     | 0.48             | 0.04            | C               | T                   | T                      |               |                                     |
| 79  | rs2549004    |              |         | 131904041                   | 3.1                     | 2.82       | 0.09     | 0.31             | 0.04            | C               | G                   | G                      |               |                                     |
| 80  | rs736801     |              |         | 131908815                   | 6.3                     | 0.09       | 0.77     | 0.37             | 0.04            | C               | T                   | C                      |               |                                     |
| 81  | rs2706390    |              |         | 131918497                   | 4.7                     | 0.84       | 0.36     | 0.16             | 0.03            | C               | A                   | C                      |               | sox 5 (WT)                          |
| 82  | rs2706391    |              |         | 131919523                   | 1.6                     | 0.49       | 0.48     | 0.17             | 0.03            | T               | C                   | T                      |               |                                     |
| 83  | rs2743562    | 3'UTR        | IL5     | 131946599                   | 4.7                     | 2.91       | 0.09     | 0.48             | 0.04            | C               | T                   | C                      |               |                                     |
| 84  | rs2069812    | Promoter     | IL5     | 131956132                   | 15.6                    | 0.01       | 0.92     | 0.32             | 0.04            | C               | T                   |                        |               |                                     |
| 85  | rs17166050   |              |         | 131991430                   | 7.8                     | 4.47       | 0.03     | 0.19             | 0.03            | C               | T                   |                        |               | MyT1 zinc finger TF (MT)            |
| 86  | rs12187537   |              |         | 132016121                   | 4.7                     | 3.93       | 0.05     | 0.19             | 0.03            | A               | C                   |                        |               | ccat/enhancer bp beta (WT)          |
| 87  | rs3798135    |              |         | 132041325                   | 0.0                     | 2.37       | 0.12     | 0.20             | 0.04            | G               | A                   | G                      |               | cut-like protein (WT)               |
| 88  | rs1800925    | Promoter     | IL13    | 132069025                   | 6.3                     | 1.33       | 0.25     | 0.19             | 0.03            | G               | A                   | A                      | asthma        |                                     |
| 89  | rs2068960    | Intron       | IL13    | 132070651                   | 10.9                    | 0.08       | 0.78     | 0.09             | 0.03            | C               | A                   | A                      |               |                                     |
| 90  | rs1295886    | E/I boundary | IL13    | 132073359                   | 6.3                     | 1.53       | 0.22     | 0.25             | 0.04            | G               | A                   | A                      |               | upstream stimulating factor (WT)    |
| 91  | rs20541      | Exon         | IL13    | 132072180                   | 0.0                     | 0.05       | 0.82     | 0.23             | 0.04            | C               | T                   | C                      | asthma        |                                     |
| 92  | rs1295885    | Exon         | IL13    | 132072661                   | 0.0                     | 0.05       | 0.82     | 0.23             | 0.04            | C               | T                   | C                      | asthma        |                                     |
| 93  | rs848        | Exon         | IL13    | 132072716                   | 3.1                     | 0.09       | 0.77     | 0.23             | 0.04            | G               | T                   | T                      |               |                                     |
| 94  | rs847        | Exon         | IL13    | 132072885                   | 4.7                     | 0.20       | 0.66     | 0.22             | 0.04            | C               | T                   | T                      |               |                                     |
| 95  | rs20699757   | 3'UTR        | IL13    | 132074629                   | 7.8                     | 0.03       | 0.85     | 0.08             | 0.02            | G               | A                   | G                      |               |                                     |
| 96  | rs2243204    | 3'UTR        | IL13    | 132075710                   | 0.0                     | 0.13       | 0.72     | 0.10             | 0.03            | C               | T                   | T                      |               |                                     |
| 97  | rs2243208    | Intron       | IL4     | 132076365                   | 14.1                    | 0.02       | 0.79     | 0.15             | 0.03            | C               | T                   | A                      |               |                                     |
| 98  | rs2243210    | 3'UTR        | IL13    | 132077602                   | 7.8                     | 0.03       | 0.85     | 0.08             | 0.02            | G               | A                   | A                      |               |                                     |
| 99  | rs2243211    | Promoter     | IL4     | 132077638                   | 18.8                    | 0.04       | 0.85     | 0.09             | 0.02            | C               | A                   | C                      |               |                                     |
| 100 | rs2243219    | Promoter     | IL4     | 132078341                   | 0.0                     | 0.03       | 0.87     | 0.09             | 0.02            | A               | G                   | G                      |               |                                     |
| 101 | rs2243228    | Promoter     | IL4     | 132080579                   | 0.0                     | 0.03       | 0.87     | 0.09             | 0.02            | A               | C                   | A                      |               |                                     |
| 102 | rs22         |              |         |                             |                         |            |          |                  |                 |                 |                     |                        |               |                                     |
